# Supplementary material for: Mechanism of asphaltene aggregation induced by supercritical CO2: insights from molecular dynamics simulation
Source: Royal Society of Chemistry journal article supplement (doi:10.1039/c7ra09736k), 2017-01-01
Supplement: c7ra09736k1.pdf [file c7ra09736k1.pdf]

Supplementary data for

**Mechanism of asphaltene aggregation induced by supercritical CO<sub>2</sub>:  
insight from the molecular dynamics simulation**

*Bing Liu \**, *Jiawei Li*, *Chao Qi*, *Xiaoqi Li*, *Tingyi Mai*, *Jun Zhang \**

School of Science, China University of Petroleum, Qingdao 266580, Shandong, China

## 1. The process of asphaltene aggregation

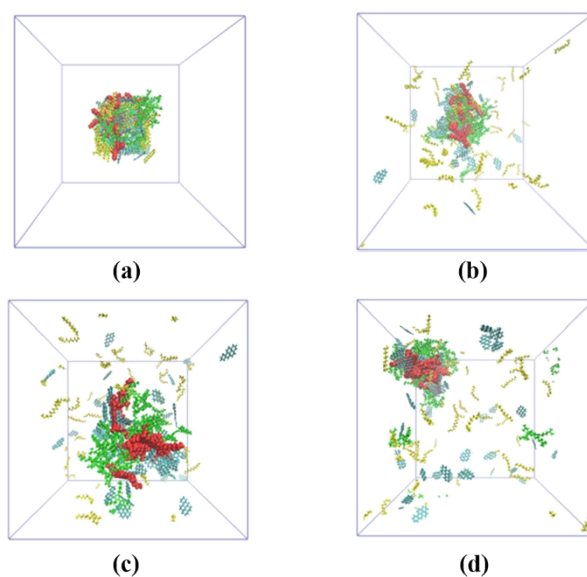

**Fig.S1.** Perspective view of oil-scCO<sub>2</sub> system. Snapshots are taken at (a) 0ns (b) 1.2 ns (c) 3.5 ns and (d) 10 ns.

Color scheme: red, asphaltene; green, resin; blue, aromatic; yellow, saturate; ScCO<sub>2</sub> is not shown for clarity.

To visualize the process of selective extraction and asphaltene aggregation, perspective view of oil-scCO<sub>2</sub> system were reported in Fig. S1. It can be seen that saturate and aromatic are extracted firstly, as shown in Fig. S1(b). During the extraction of resin, the distance among asphaltenes increases significantly, as shown in Fig. S1(c). Finally, asphaltenes aggregate and form a compact nanoaggregate after other components are extracted, as shown in Fig. S1(d). The formation of asphaltene aggregate coincides with experimental results [1,2].

## 2. The potential and temperature of system

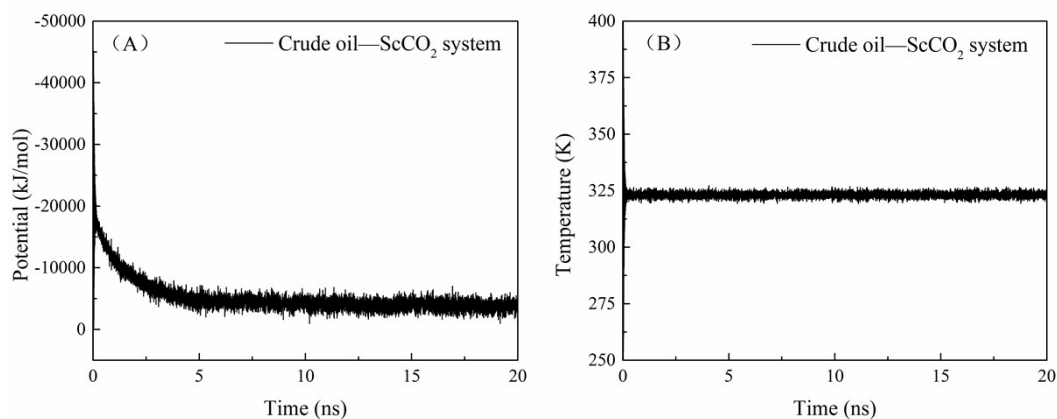

**Fig.S2.** The time evolution of the system's (A) potential energy and (B) temperature.

After 6-7 ns, system's potential energy essentially halted decline, as shown in Fig. S2(A). System's temperature was controlled around 372.15 K during simulation, as shown in Fig. S2(B). Base on that, equilibrium is considered has been attained.

### 3. RDF

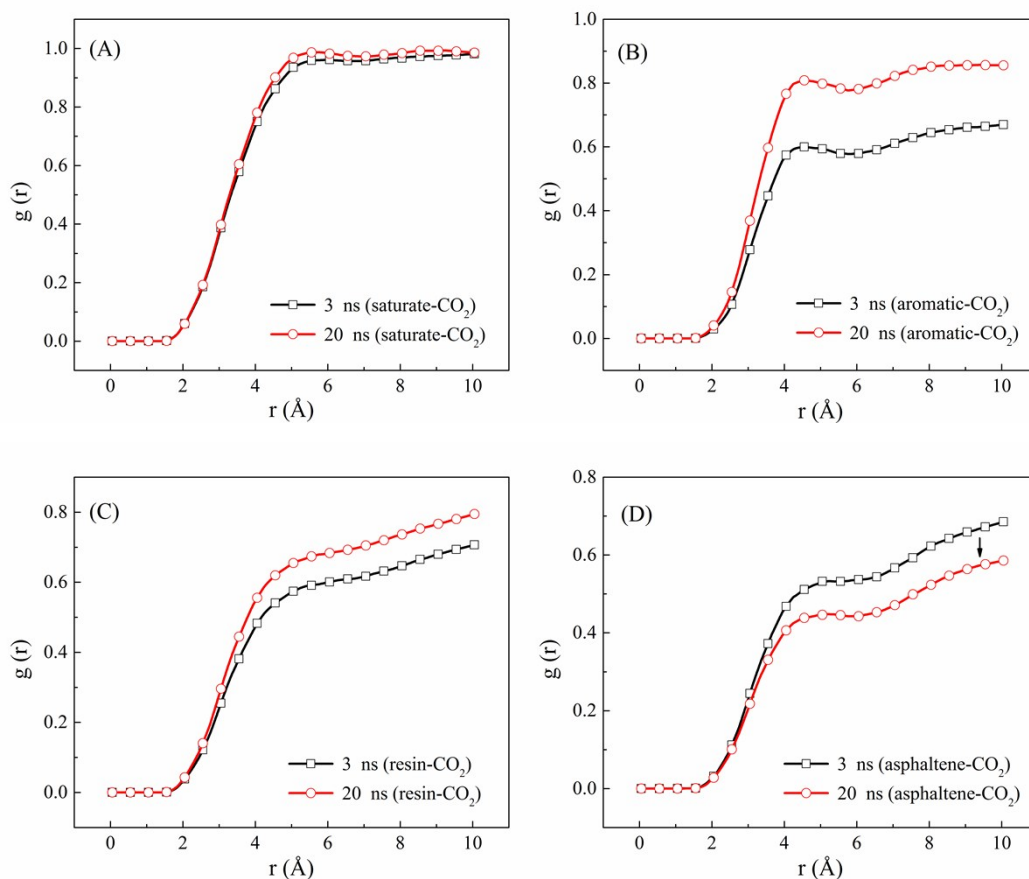

**Fig. S3.** Radial distribution functions between oil components and CO<sub>2</sub>. (A): saturate-CO<sub>2</sub>, (B): aromatic-CO<sub>2</sub>, (C): resin-CO<sub>2</sub>, and (D): asphaltene-CO<sub>2</sub>. Radial distribution functions are taken from 3ns and 20ns.

2-D molecular number density maps do not include the information content in Z-direction, to assess quantify certainties the radial distribution functions between oil components and CO<sub>2</sub> are analyzed. It can be seen that saturate, aromatic and saturate components are more soluble in scCO<sub>2</sub> at 20 ns than 3 ns. By contrast, asphaltene is more insoluble at 20 ns than 3 ns, in other words, more compact in scCO<sub>2</sub>.

### 4. PMF calculation

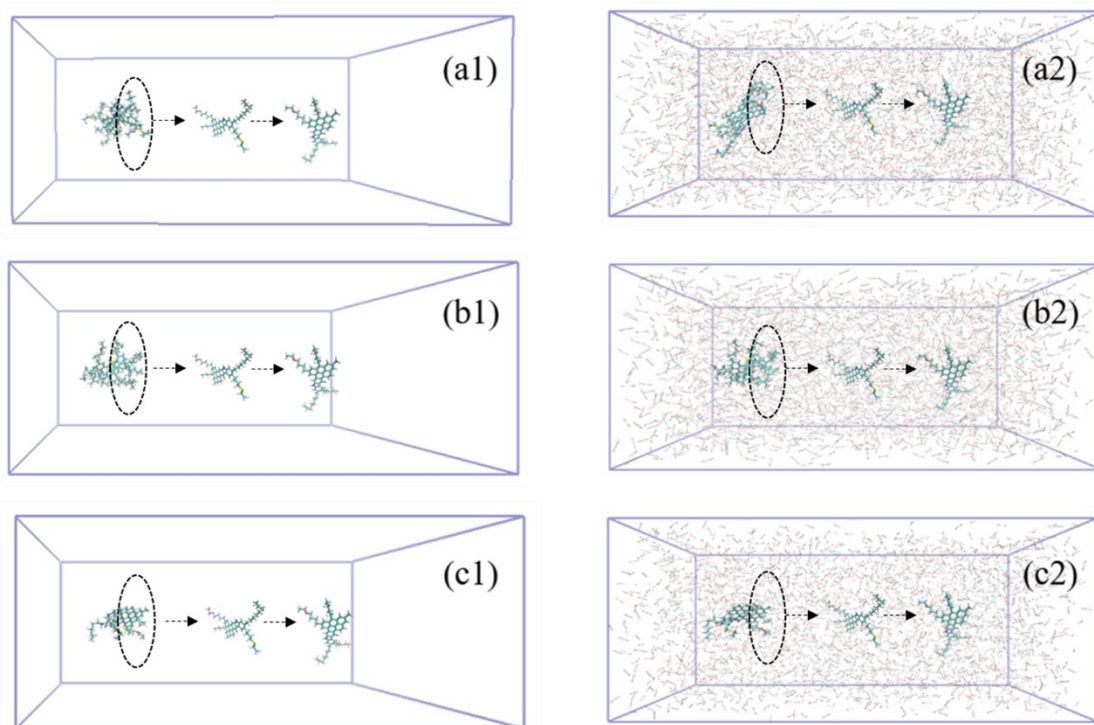

**Fig.S4.** Perspective view of simulation setup for PMF. Color scheme: cyan = carbon, white = hydrogen, red = oxygen, yellow = sulfur, blue = nitrogen.

In order to investigate the effective interaction among oil components using umbrella sampling method [3], 6 simulation boxes were established as shown in Fig. S4. The upper two boxes contain two asphaltene molecules; the middle two boxes contain one asphaltene molecule and one resin molecule; and the bottom two boxes contain one asphaltene molecule and one aromatic molecule. In addition, the right three boxes fill with  $\text{CO}_2$  molecules. Then the COM of one molecule was pulled along Z-axis while the other one was restrained.

## References

- [1] R. Nguele, M. R. Ghulami, K. Sasaki, S. A. Salim, A. Widiatmojo, Y. Sugai, M. Nakano, Asphaltene aggregation in crude oils during supercritical gas injection, *Energy Fuels*, 30 (2016) 1266-1278.
- [2] P. Zanganeh, H. Dashti, S. Ayatollahi, Visual investigation and modeling of asphaltene precipitation

and deposition during CO<sub>2</sub> miscible injection into oil reservoirs, *Fuel* 160 (2015) 132-139.

[3] J. Kästner, Umbrella sampling, *Wiley Interdiscip. Rev.: Comput. Mol. Sci.* 1 (2011) 932-942.
